# Supplementary material for: Ultrastructure of early amelogenesis in wild‐type, Amelx ‐/‐, and Enam ‐/‐ mice: enamel ribbon initiation on dentin mineral and ribbon orientation by ameloblasts
Source: PubMed Central journal article supplement (PMC5118210; doi:10.1002/mgg3.253), 2016-10-16
Supplement: MGG3-4-662-s002.pdf [file MGG3-4-662-s002.pdf]

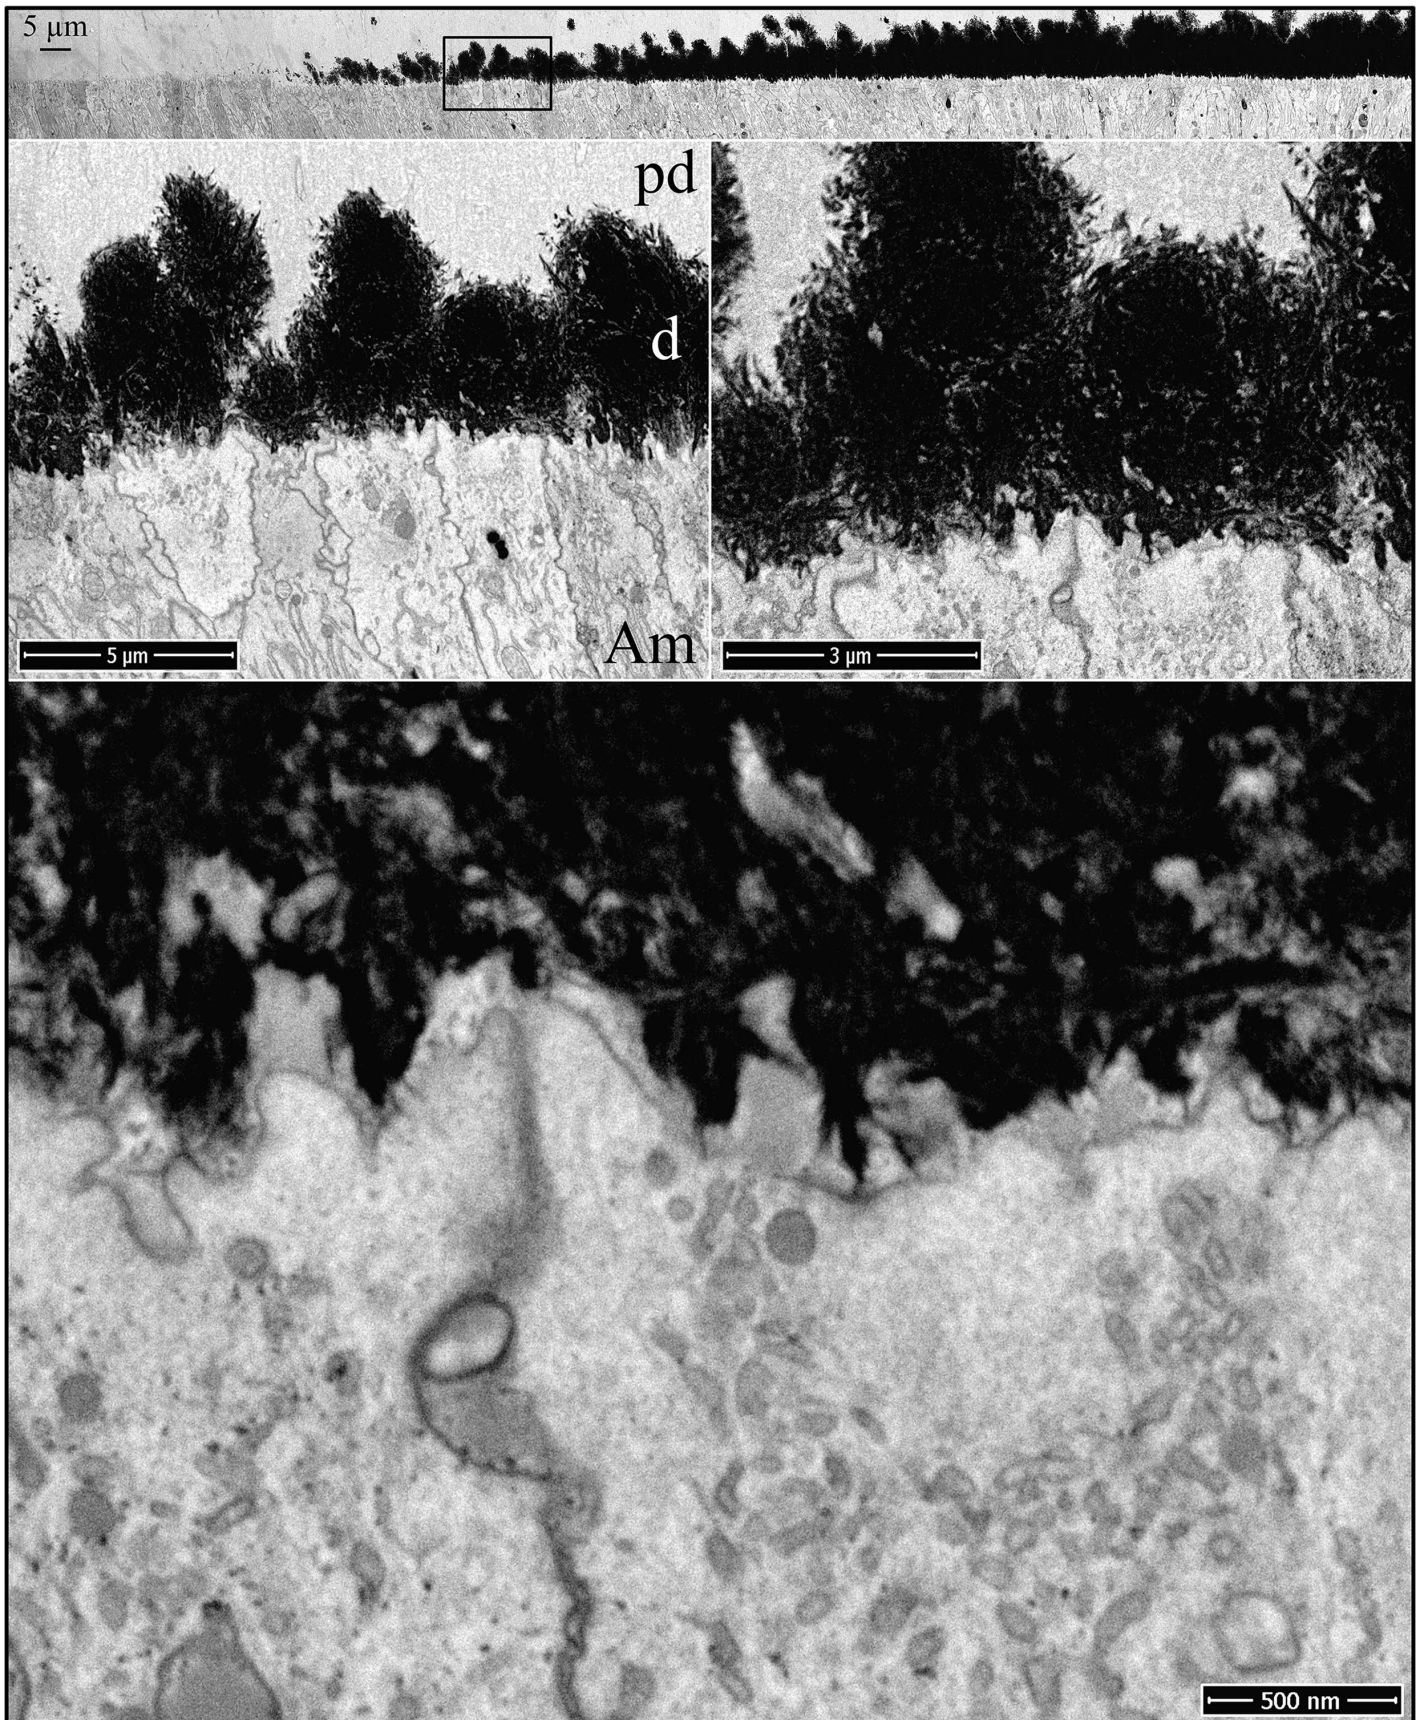

**Figure S13.** Focused ion beam images after the coalescing and expansion of dentin mineral into a continuous layer with ameloblasts in an *Enam*<sup>-/-</sup> mouse mandibular incisor. **Top:** Low magnification montage of the incisor Level 1 cross-section that was characterized. The box outlines the region detailed by higher magnification images shown below. No enamel ribbons have formed. **Key:** Am, ameloblast; d, dentin; pd, predentin. Figures S13 through S21 Support Figure 9.

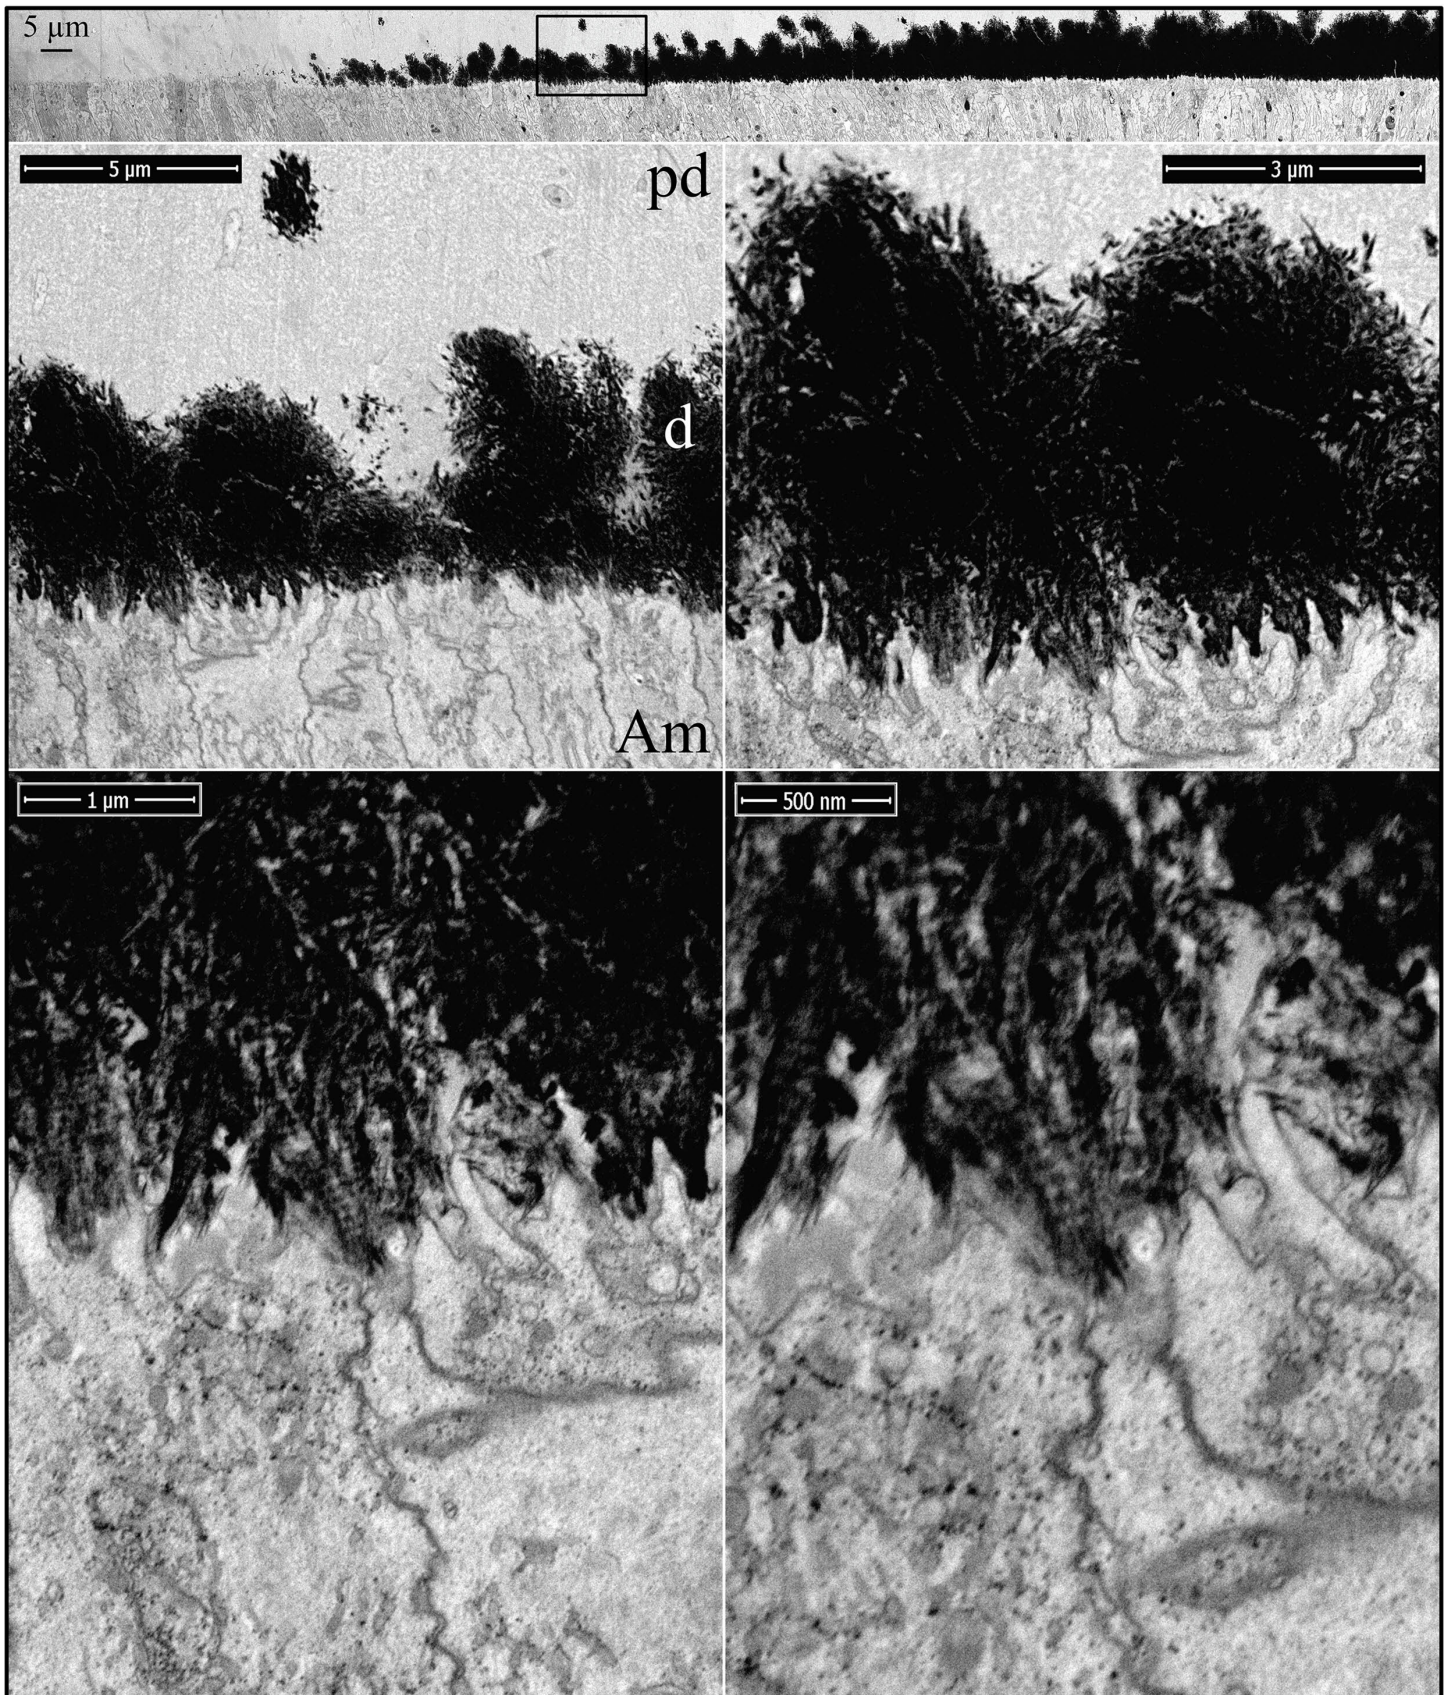

**Figure S14.** Focused ion beam images after the coalescing and expansion of dentin mineral into a continuous layer with ameloblasts in an *Enam*<sup>-/-</sup> mouse mandibular incisor. **Top:** Low magnification montage of the incisor Level 1 cross-section that was characterized. The box outlines the region detailed by higher magnification images shown below. No enamel ribbons have formed. **Key:** Am, ameloblast; d, dentin; pd, pre-dentin. Figures S13 through S21 Support Figure 9.

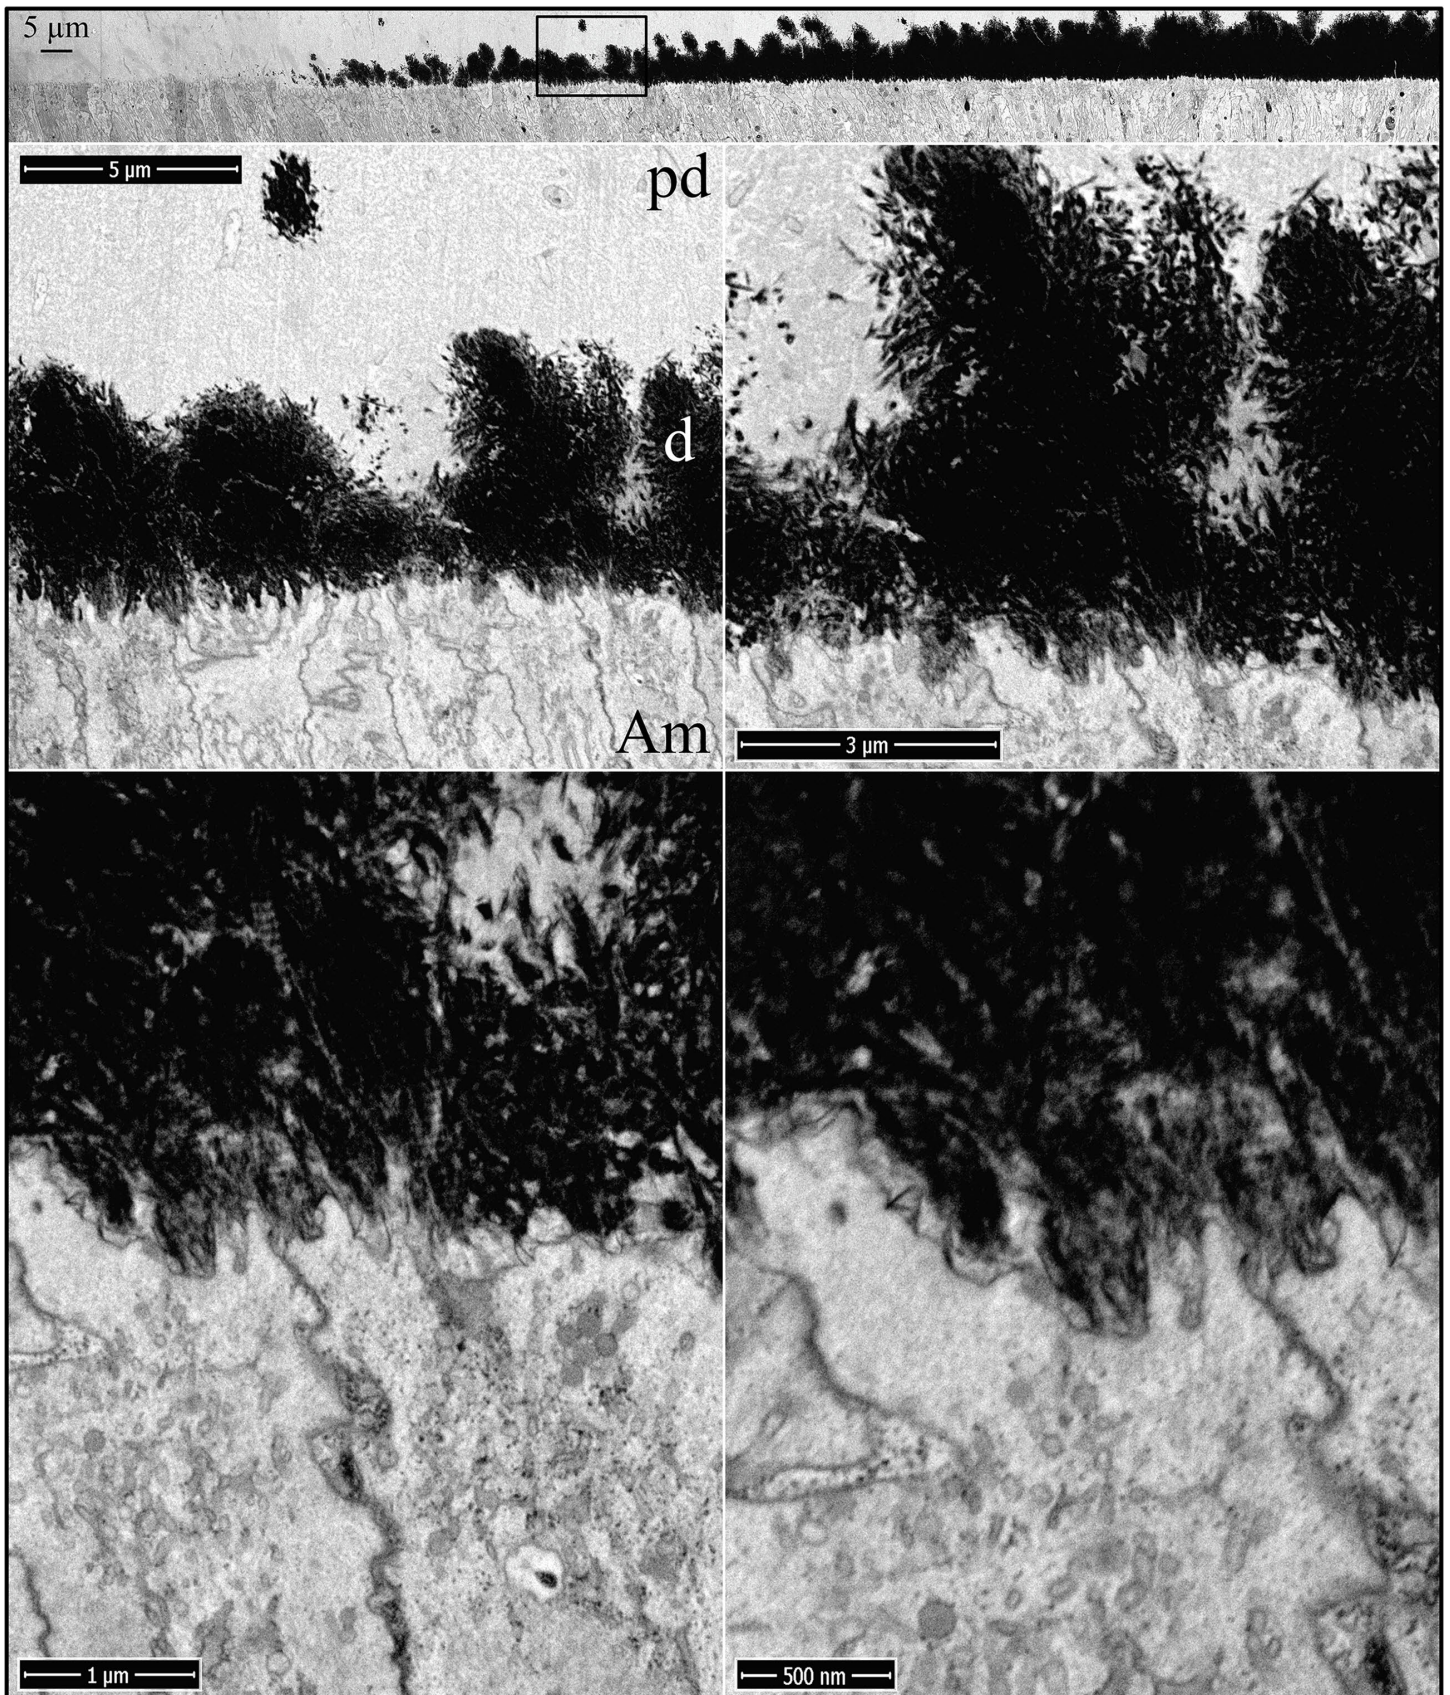

**Figure S15.** Focused ion beam images after the coalescing and expansion of dentin mineral into a continuous layer with ameloblasts in an *Enam*<sup>-/-</sup> mouse mandibular incisor. **Top:** Low magnification montage of the incisor Level 1 cross-section that was characterized. The box outlines the region detailed by higher magnification images shown below. **Key:** Am, ameloblast; d, dentin; pd, predentin. Figures S13 through S21 Support Figure 9.

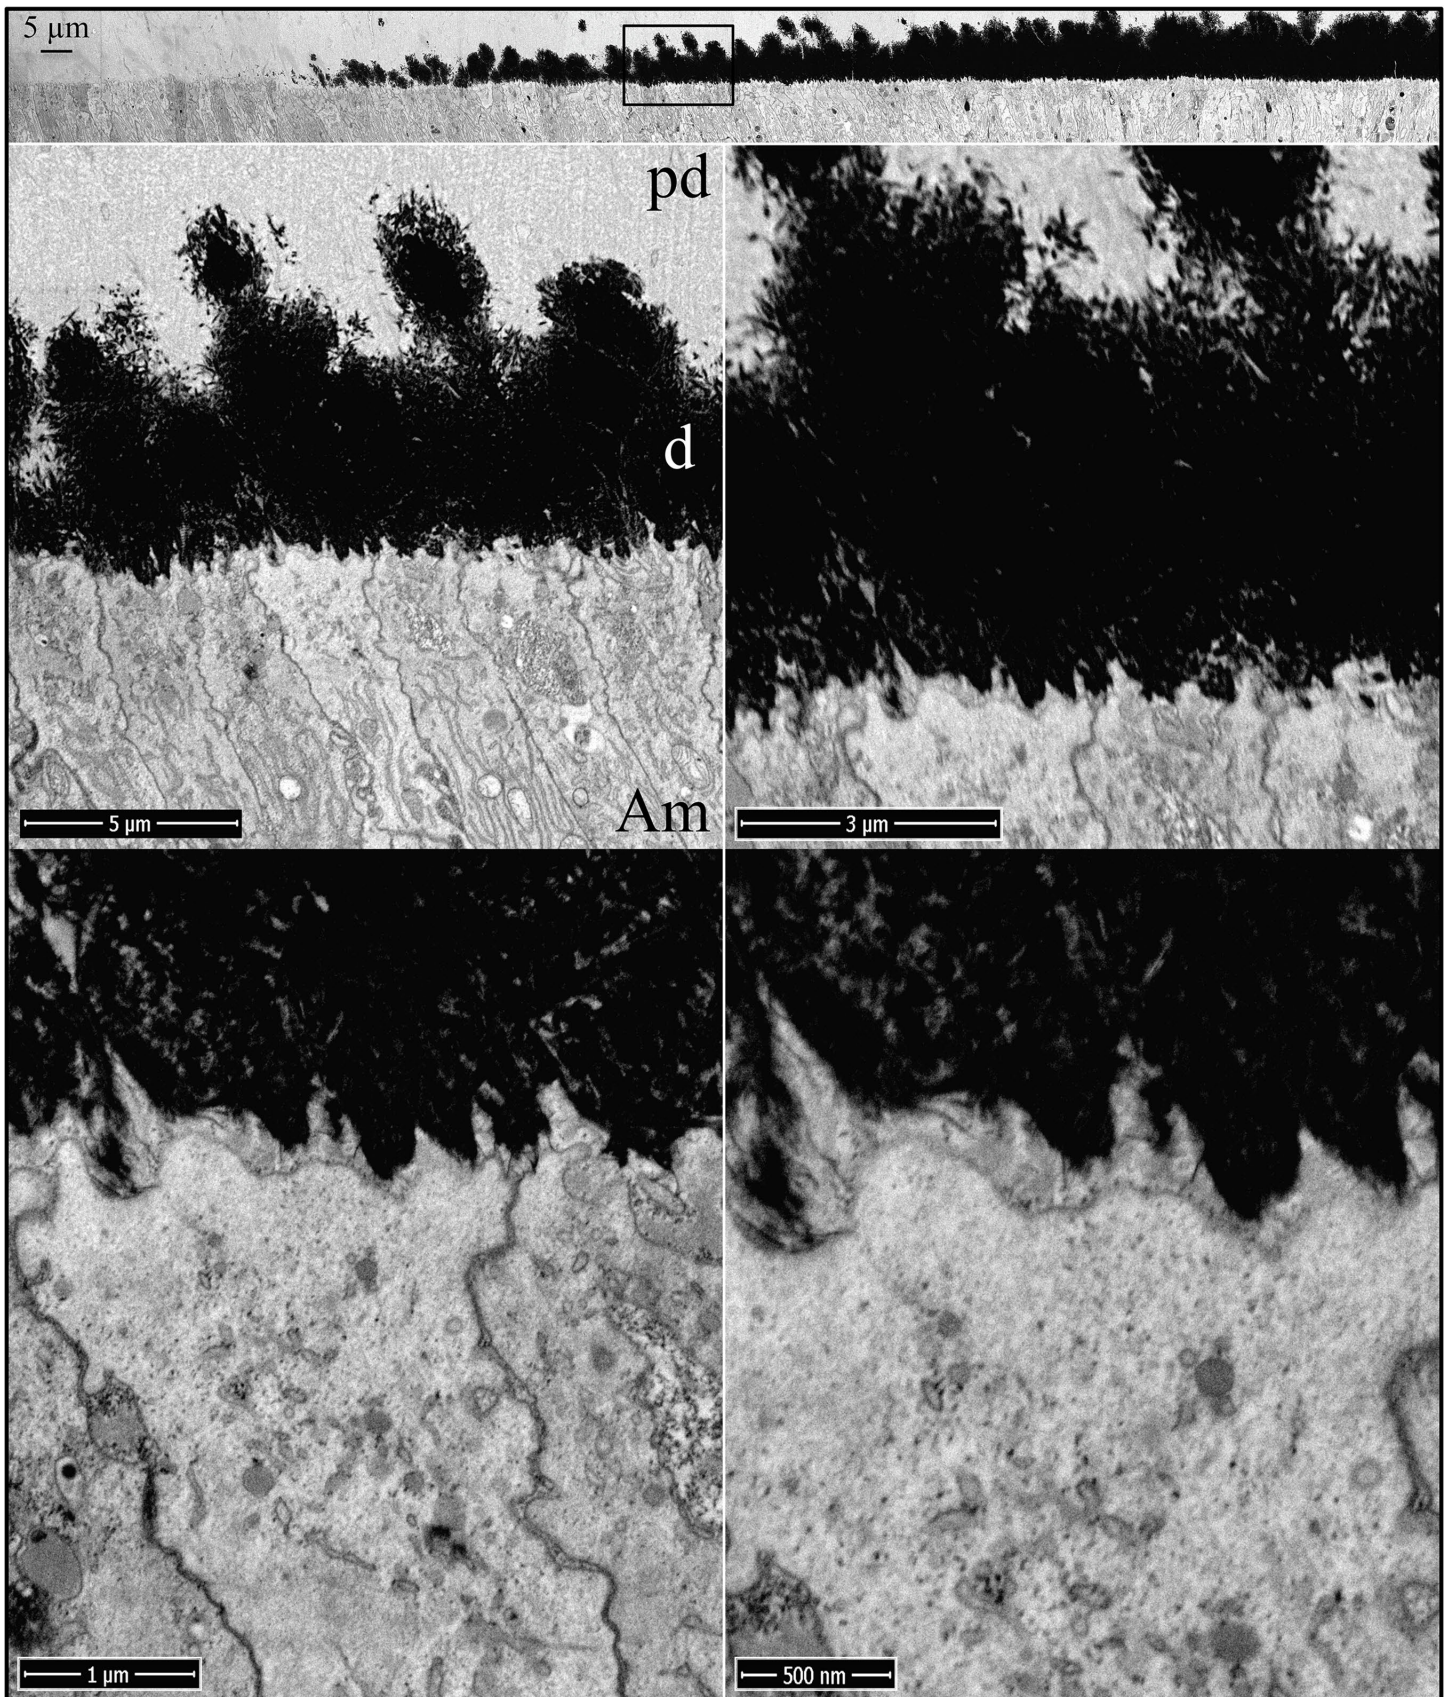

**Figure S16.** Focused ion beam images after the coalescing and expansion of dentin mineral into a continuous layer with ameloblasts in an *Enam*<sup>-/-</sup> mouse mandibular incisor. **Top:** Low magnification montage of the incisor Level 1 cross-section that was characterized. The box outlines the region detailed by higher magnification images shown below. **Key:** Am, ameloblast; d, dentin; pd, predentin. Figures S13 through S21 Support Figure 9.

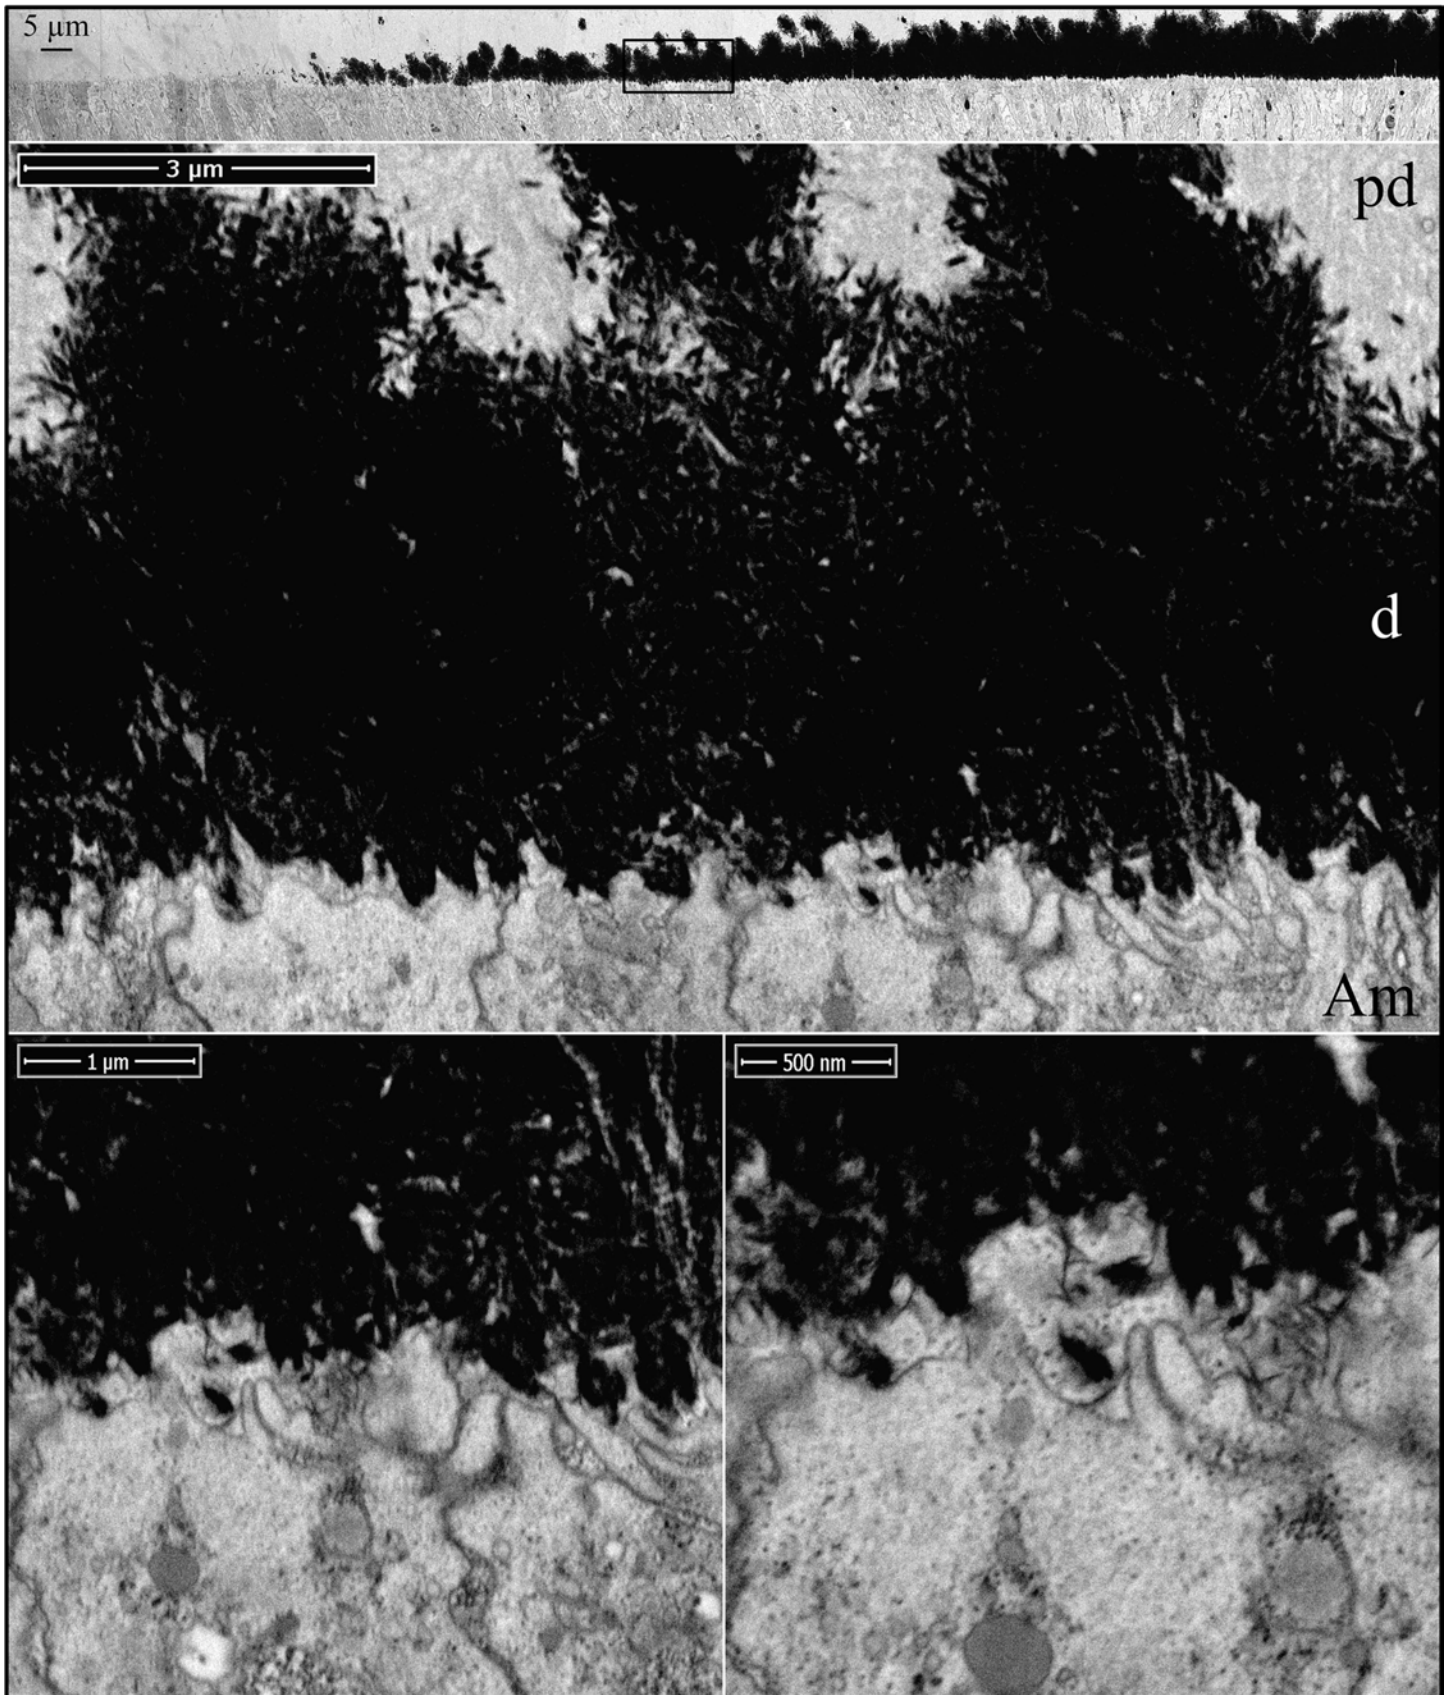

**Figure S17.** Focused ion beam images after the coalescing and expansion of dentin mineral into a continuous layer with ameloblasts in an *Enam*<sup>-/-</sup> mouse mandibular incisor. **Top:** Low magnification montage of the incisor Level 1 cross-section that was characterized. The box outlines the region detailed by higher magnification images shown below. No enamel ribbons have formed. **Key:** Am, ameloblast; d, dentin; pd, predentin. Figures S13 through S21 Support Figure 9.

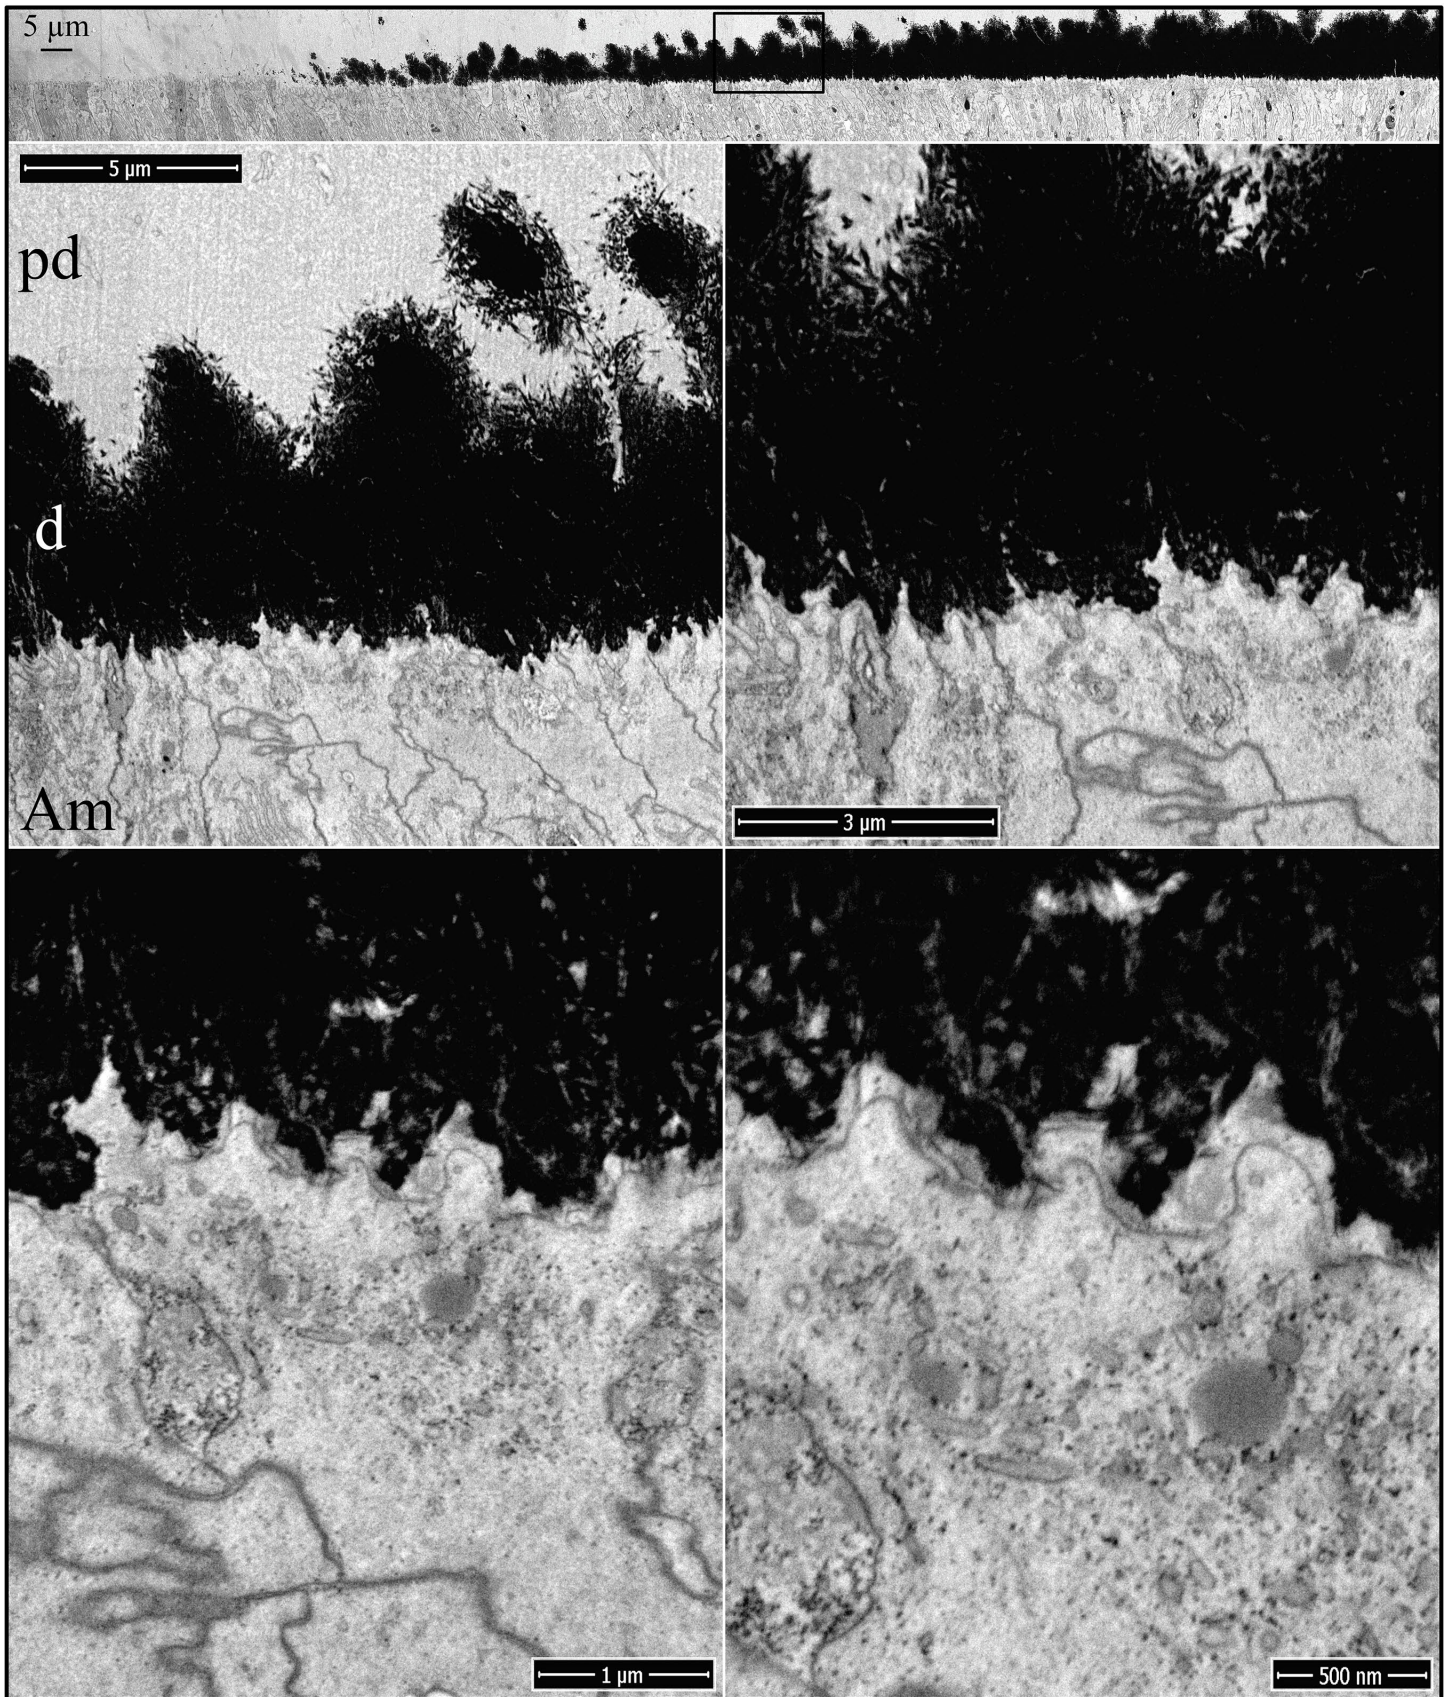

**Figure S18.** Focused ion beam images after the coalescing and expansion of dentin mineral into a continuous layer with ameloblasts in an *Enam*<sup>-/-</sup> mouse mandibular incisor. **Top:** Low magnification montage of the incisor Level 1 cross-section that was characterized. The box outlines the region detailed by higher magnification images shown below. No enamel ribbons have formed. **Key:** Am, ameloblast; d, dentin; pd, predentin. Figures S13 through S21 Support Figure 9.

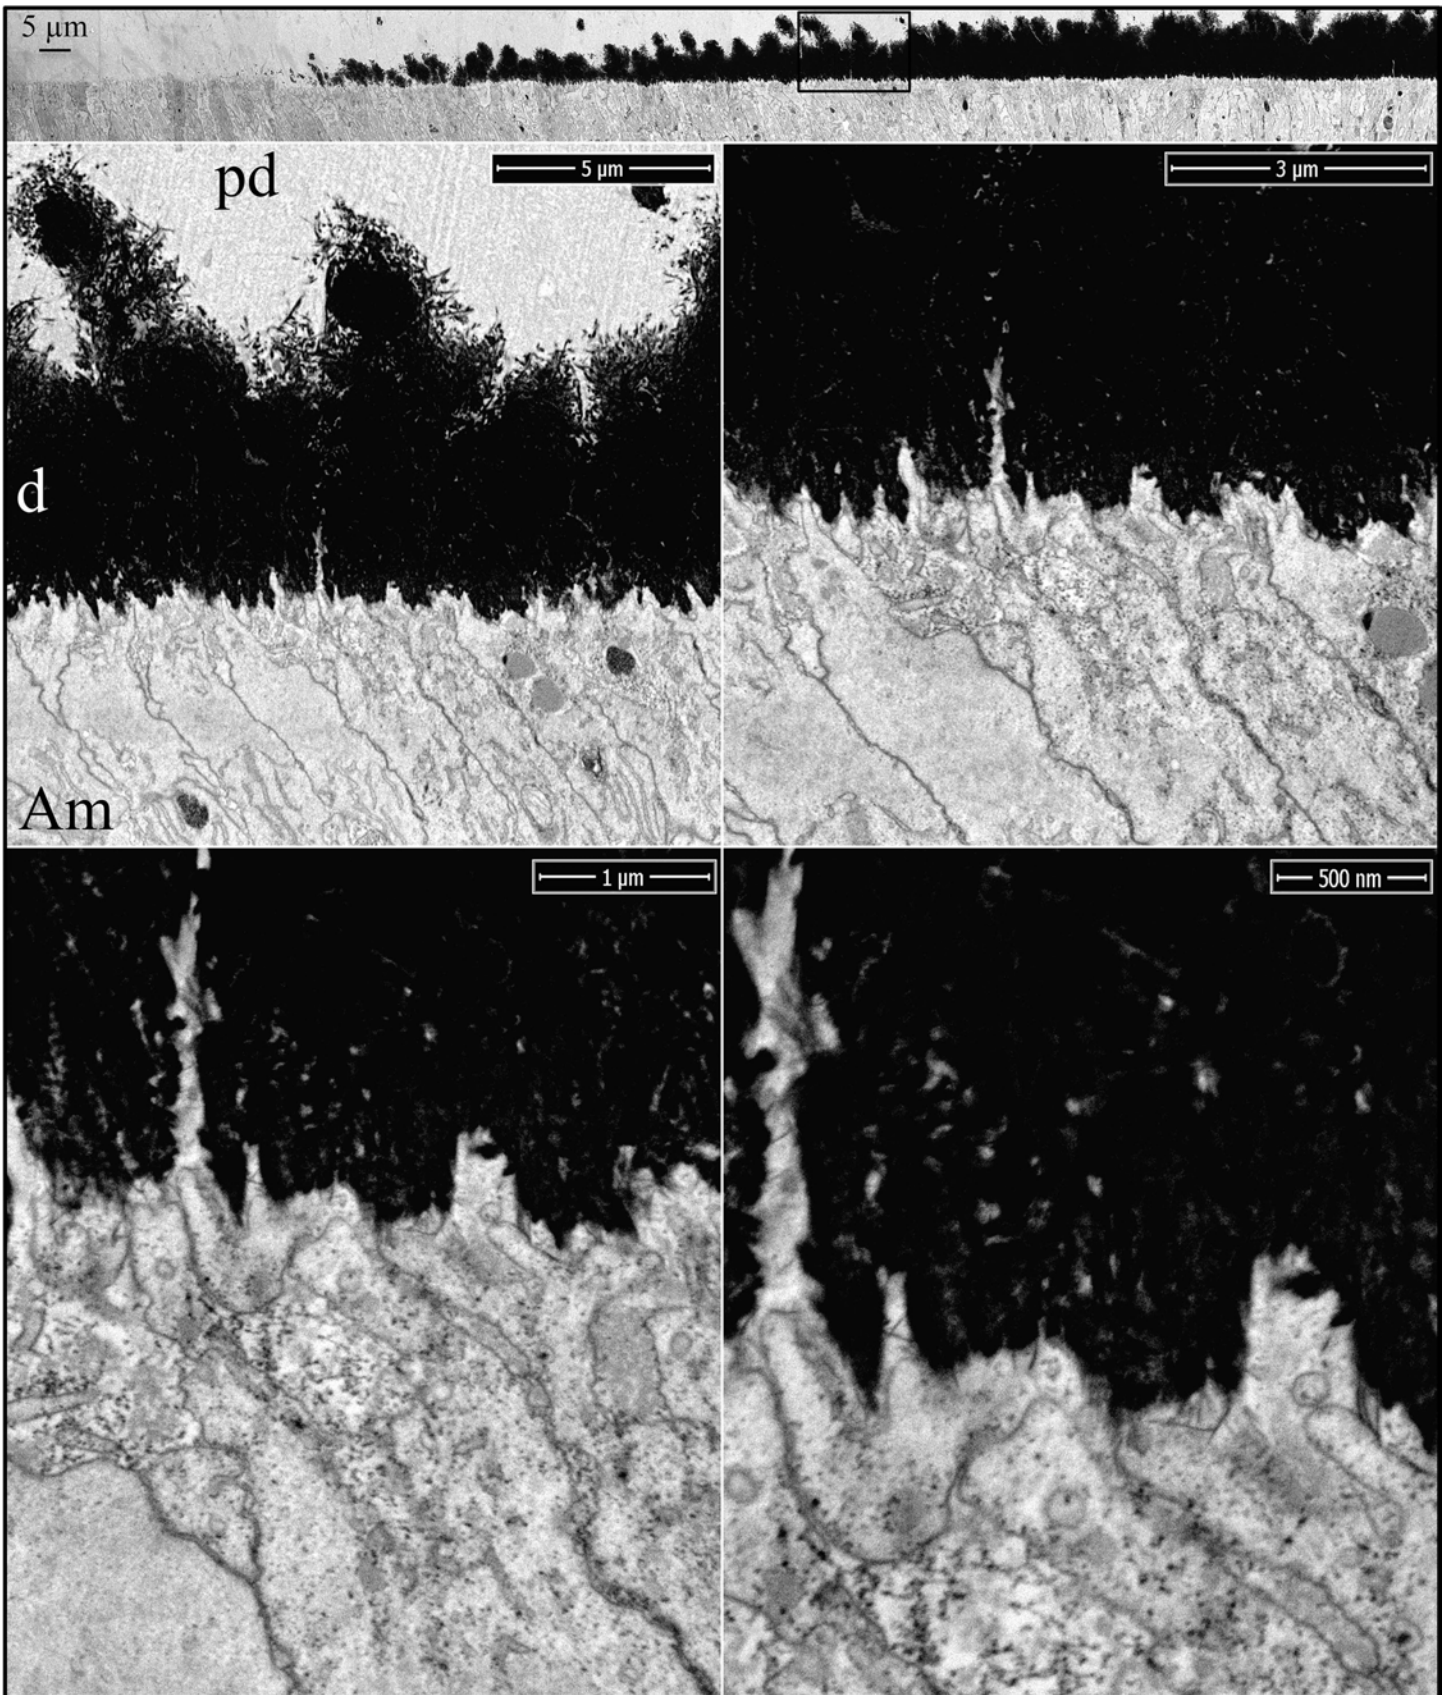

**Figure S19.** Focused ion beam images after the coalescing and expansion of dentin mineral into a continuous layer with ameloblasts in an *Enam*<sup>-/-</sup> mouse mandibular incisor. **Top:** Low magnification montage of the incisor Level 1 cross-section that was characterized. The box outlines the region detailed by higher magnification images shown below. Not enamel ribbons have formed. **Key:** Am, ameloblast; d, dentin; pd, predentin. Figures S13 through S21 Support Figure 9.

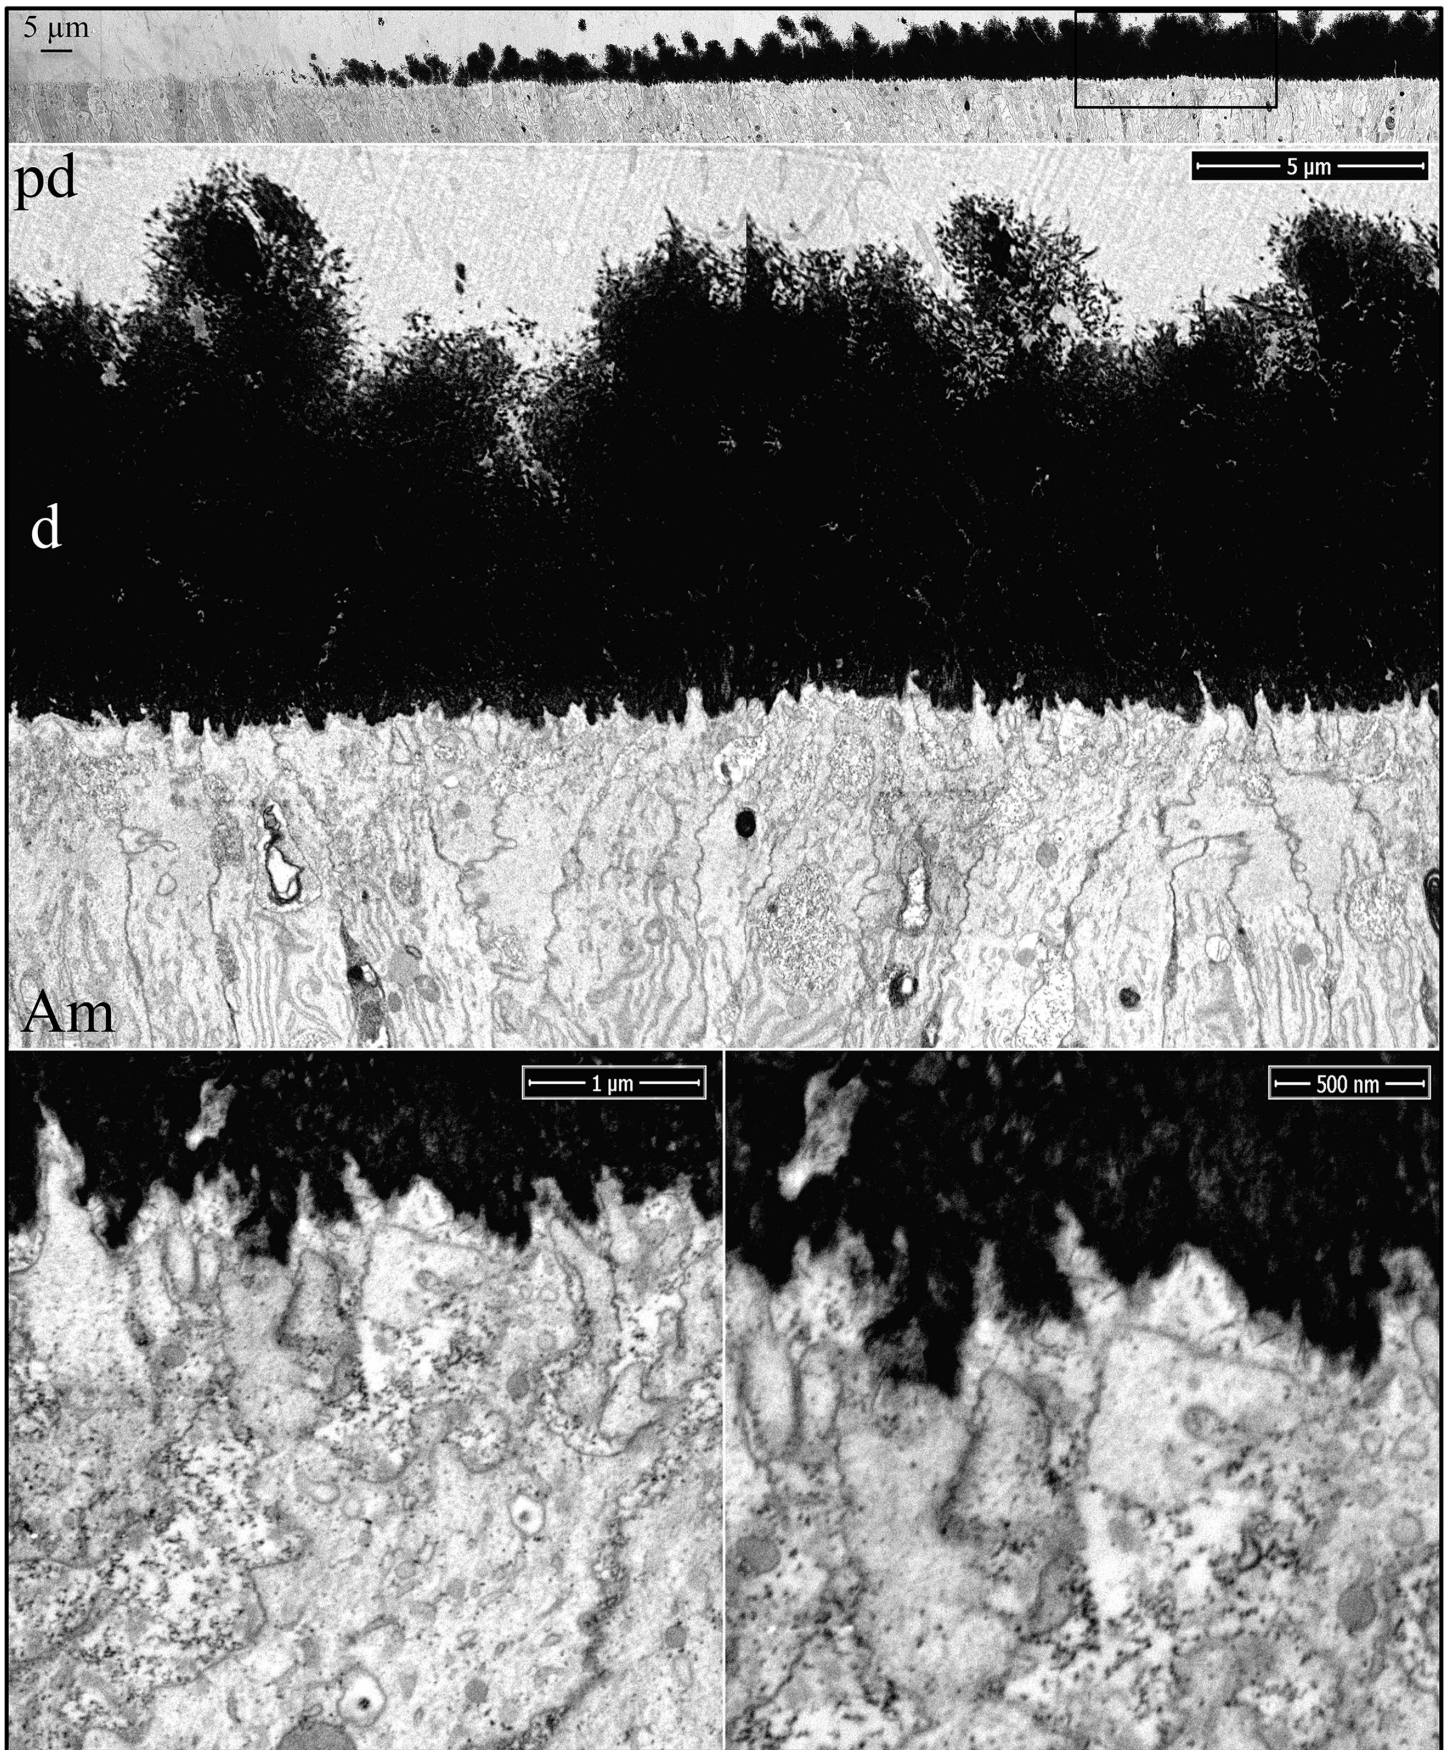

**Figure S20.** Focused ion beam images after the coalescing and expansion of dentin mineral into a continuous layer with ameloblasts in an *Enam*<sup>-/-</sup> mouse mandibular incisor. **Top:** Low magnification montage of the incisor Level 1 cross-section that was characterized. The box outlines the region detailed by higher magnification images shown below. **Key:** Am, ameloblast; d, dentin; pd, predentin. Figures S13 through S21 Support Figure 9.



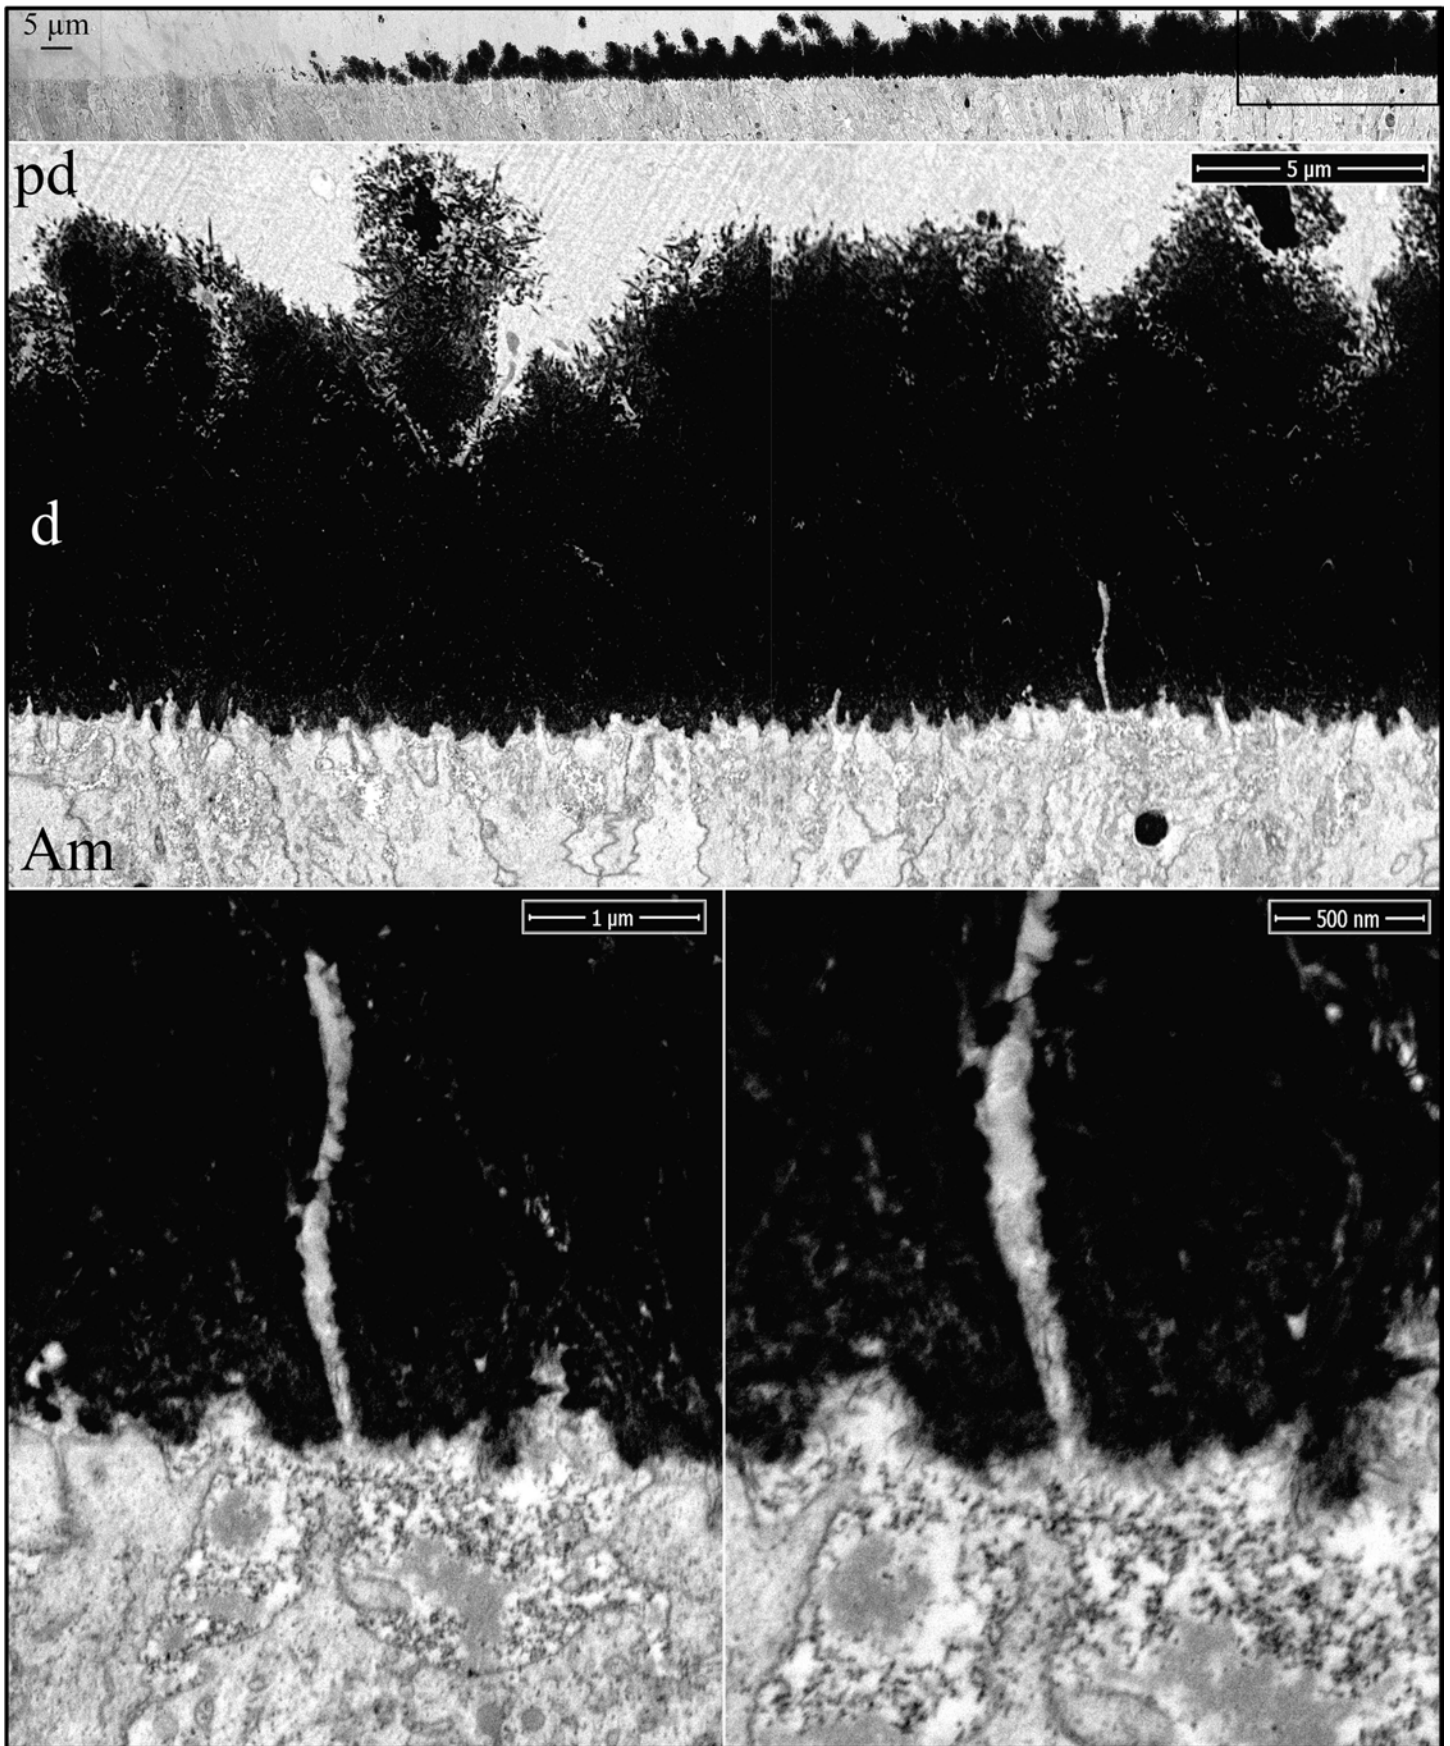

**Figure S21.** Focused ion beam images after the coalescing and expansion of dentin mineral into a continuous layer with ameloblasts in an *Enam*<sup>-/-</sup> mouse mandibular incisor. **Top:** Low magnification montage of the incisor Level 1 cross-section that was characterized. The box outlines the region detailed by higher magnification images shown below. **Key:** Am, ameloblast; d, dentin; pd, predentin. Figures S13 through S21 Support Figure 9.
